# Supplementary material
Source: publisher figshare collection journal article supplement (https://acs.figshare.com/ndownloader/files/10956380)
Supplement: Supplementary file 1 [file 10956380]

## Supporting Information

# Poly( $\epsilon$ -caprolactone) Biocomposites Based on Acetylated Cellulose Fibers and Wet Compounding for Improved Mechanical Performance

*Giada Lo Re, \*, †, ‡, §, ¶ Stephen Spinella, ‡, ¶ Assya Boujemaoui, †, ¶ Fabiola Vilaseca, §, ¶ Per Tomas*

*Larsson, †, // Fredrik Adås, // and Lars A. Berglund\* †*

†Division of Biocomposites and Wallenberg Wood Science Center, School of Chemical Science and Engineering, Department of Fibre and Polymer Technology, KTH Royal Institute of Technology, Teknikringen 56, Stockholm, SE-100 44, Sweden

‡NYU Tandon School of Engineering, Six Metrotech Center, Brooklyn, New York 11201,

*United States*

§ BIMATEC Group, Department of Chemical Engineering, Agricultural and Food Technology, University of Girona, C/Maria Aurelia Capmany 61, 17003 Girona, Spain

// RISE Bioeconomy, Teknikringen 56, Stockholm, SE-100 44, Sweden

### **\*Corresponding Authors**

\* Giada Lo Re; Email: giadalr@kth.se; Ph: +46-8-790 8037; Fax: +46 8 207865

\* Lars A. Berglund; Email: blund@kth.se

**The Supporting information includes 7 total number of pages, 5 figures and 3 tables.**

**Solid state Nuclear Magnetic Resonance details**

Cross-Polarization Magic Angle Spinning Carbon-13 Nuclear Magnetic Resonance (CP/MAS  $^{13}\text{C}$ -NMR) spectra were recorded in a Bruker Avance III AQS 400 SB instrument operating at 9.4 T. All measurements were carried out at 295 ( $\pm 1$ ) K with a magic angle spinning (MAS) rate of 10 kHz. A 4-mm double air-bearing probe was used. Data acquisition was performed using a cross-polarization (CP) pulse sequence, i.e., a 2.95 microseconds proton 90-degree pulse and an 800 microseconds ramped (100–50 %) falling contact pulse, with a 2.5 s delay between repetitions. A SPINAL64 pulse sequence was used for  $^1\text{H}$  decoupling. The Hartmann-Hahn matching procedure was based on glycine. The chemical shift scale was calibrated to the TMS-scale (tetramethylsilane,  $(\text{CH}_3)_4\text{Si}$ ) by assigning the data point of maximum intensity in the alpha-glycine carbonyl signal to a shift of 176.03 ppm. 4096 transients were recorded on each sample leading to an acquisition time of about 3 h. The software for spectral fitting was developed at Innventia AB and is based on a Levenberg-Marquardt algorithm [27]. All samples were run as delivered (low water content) and were packed uniformly in a zirconium oxide rotor. Computations of degree of crystallinity were based on integrated signal intensities obtained from spectral fitting of the C4 spectral region [28]. The errors given for parameters obtained from the fitting procedure are the standard error of the mean with respect to the quality of the fit. The degree of substitution was estimated by spectral integration using the spectrometer software (Bruker TOPSPIN 3.0). The average degree of substitution was estimated by calibrating the integral over the cellulose spectral region (approximately 120 ppm to 40 ppm) to a value of 6, subsequently integrating the methyl carbon signal at about 21 ppm. The integration procedure was repeated five times. Fibril surface degree of substitution was calculated using the fibril surface-to-volume ratio obtained by spectral fitting of the C4-region.

### **Fiber length distribution of the pulp before processing**

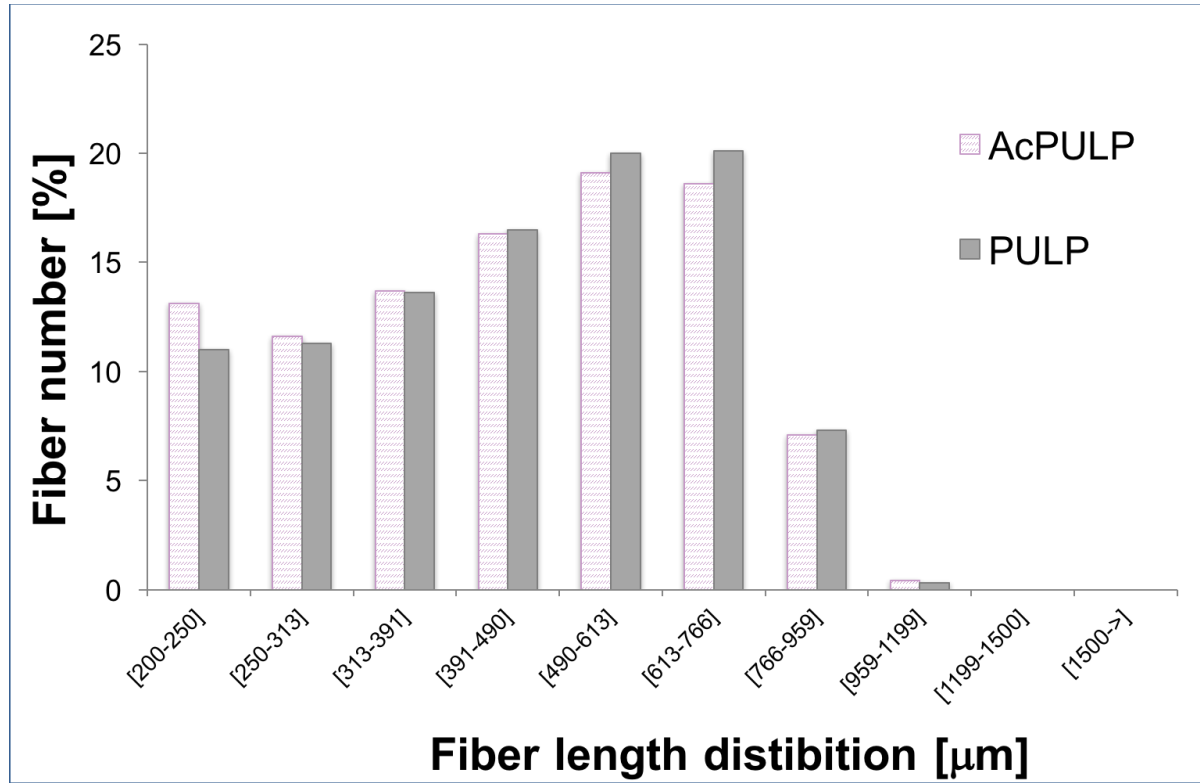

Figure S1. Fibre size distribution of the unmodified pulp and acetylated pulp.

In figure S1, the fiber length distribution is plotted; and the mean-arithmetic length ( $\overline{L_a}$ ) and the mean-weighted length ( $\overline{L_w}$ ) are provided by equations 1 and 2, respectively, where  $L_i$  represents the fiber length in each group and  $N_i$  the number of fibers in the group.

$$\overline{L_a} = \frac{\sum_i N_i L_i}{\sum_i L_i} \quad (\text{Eq. 1})$$

$$\overline{L_w} = \frac{\sum_i N_i L_i^2}{\sum_i N_i L_i} \quad (\text{Eq. 2})$$

### TGA of the fibers before processing

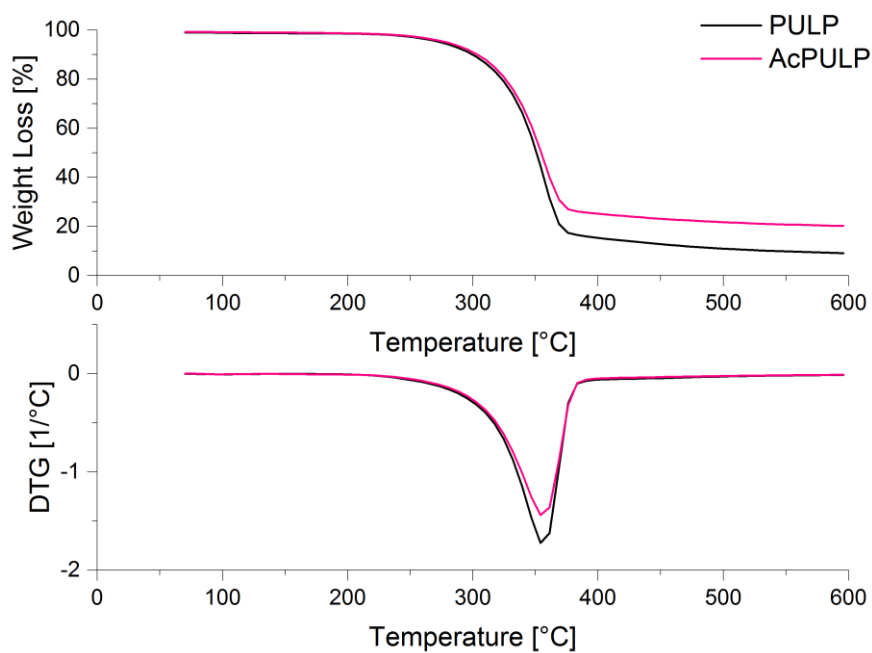

Figure S2. TGA curves and their derivatives DTG of unmodified pulp and acetylated pulp

#### Visual aspect of the injection molded dumbbell specimens

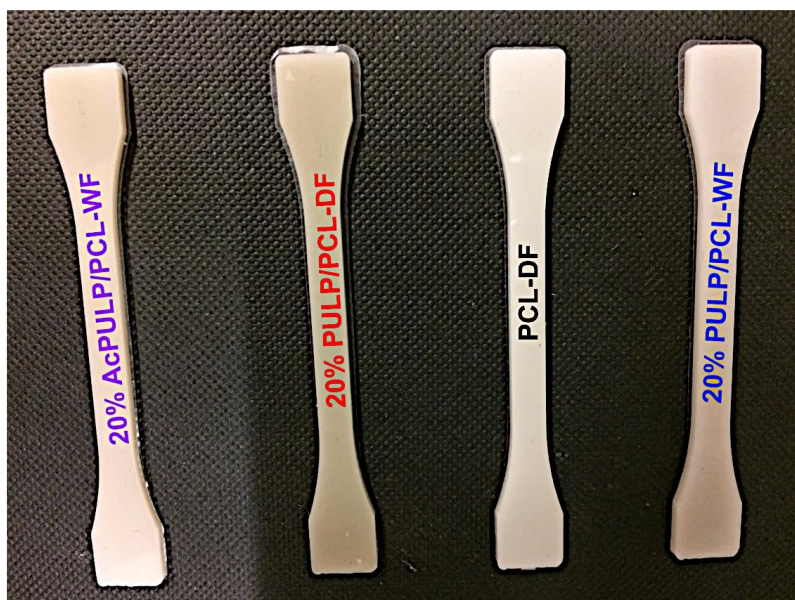

Figure S3. Picture of the compounded and injected dumbbell specimens of the prepared biocomposites.

#### TGA results of the biocomposites

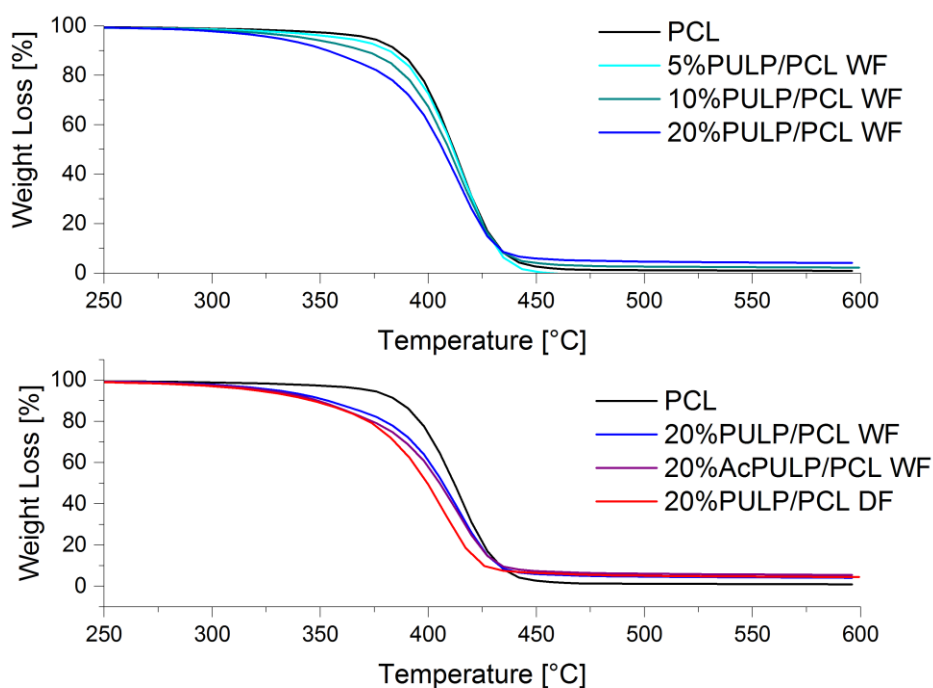

Figure S4: TGA curves and their derivatives DTG of biocomposites.

### Screw force recorded during melt compounding

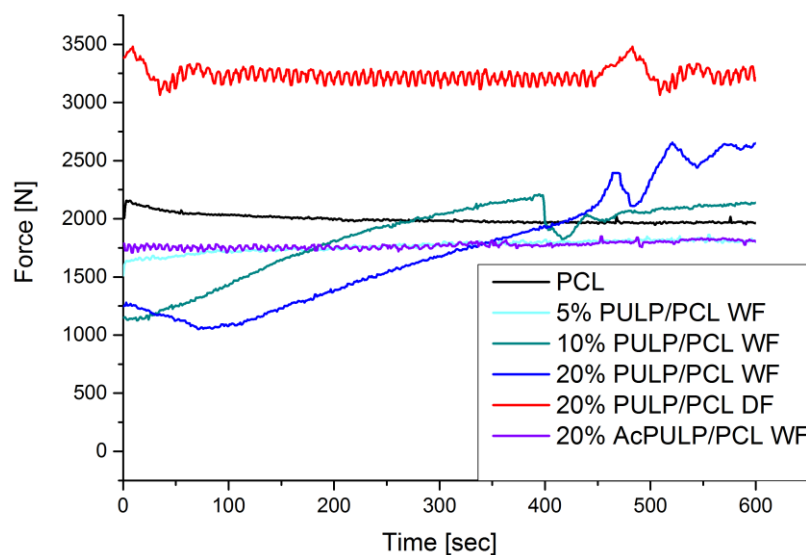

Figure S5. Screw force as a function of the processing time recorded during the melt compounding of the biocomposites and the neat PCL.

### CHCl<sub>3</sub> SEC results

Table S1. List of the different material melt processed and the corresponding molecular weights, polydispersity and the peak value of the SEC curve  $M_{z+1}$  of the PCL matrix before and after processing recovered from the soluble fraction after Soxhlet extraction of the biocomposites (considering the main population).

| SAMPLE                     | Processing time (min) | *Initial water content (%) | Mw     | Đ   | **M <sub>z+1</sub> |
|----------------------------|-----------------------|----------------------------|--------|-----|--------------------|
| PCL                        | 0                     | 0                          | 166370 | 1.5 | 280589             |
| PCL_DF                     | 30                    | 0                          | 159160 | 1.5 | 259412             |
| PCL_WF                     | 30                    | 20                         | 158790 | 1.4 | 256730             |
| PCL_WF                     | 10                    | 50                         | 165280 | 1.4 | 262660             |
| PCL from 5% PULP/PCL-WF    | 10                    | 15                         | 177600 | 1.3 | 272850             |
| PCL from 10% PULP/PCL-WF   | 10                    | 26                         | 174180 | 1.3 | 267850             |
| PCL from 20% PULP/PCL-WF   | 10                    | 41.5                       | 173660 | 1.3 | 263210             |
| PCL from 20% AcPULP/PCL-WF | 10                    | 41.5                       | 160530 | 1.3 | 261160             |
| PCL from 20% PULP/PCL-DF   | 10                    | 0                          | 167093 | 1.3 | 249770             |
| PCL from 20% AcPULP/PCL-DF | 10                    | 0                          | 169100 | 1.3 | 251750             |

\*The wet PULP used in the biocomposites has the 22% in dry content.

\*\*This value is reported in order to avoid the possible integration errors and used to compare the molecular weight of the different polycaprolactone chains used in the present study.

### DSC results of the biocomposites

Table S2. Main thermal properties recorded from the biocomposites at 20 wt% of modified or unmodified pulp from DSC analysis

|                  | xPCL [wt%] | T <sub>g</sub> * [°C] | T <sub>m</sub> [°C] | ΔH <sub>m</sub> [J/g] | χ* [%] |
|------------------|------------|-----------------------|---------------------|-----------------------|--------|
| PCL              | 1          | -44                   | 59                  | 62                    | 46     |
| 20%PULP PCL_WF   | 0.8        | -48                   | 63                  | 52                    | 48     |
| 20%AcPULP PCL_WF | 0.8        | -47                   | 64                  | 51                    | 47     |
| 20%PULP PCL_DF   | 0.8        | -47                   | 65                  | 53                    | 49     |

\*Crystallinity of The PCL was calculated by the equation:  $\chi = 100 (\Delta H_m / xPCL \Delta H_0)$ . where  $\Delta H_0 = 135.65$  J/g [Kambutter. F. B, Warner. F., Russel, T. Br Stein, R.S., J. Polym. Sci., Polym. Phys. Ed., 14].

### Fiber length distribution

Table S3 – Fiber size analysis for the pristine PULP and AcPULP and for the fibers recovered from the insoluble fraction of Soxhlet extraction in THF of the 20%PULP/PCL compounded in dry or wet feeding and the wet fed 20%AcPULP/PCL.

| SAMPLE                       | Average<br>fiber length <sup>a</sup> (μm) | Average<br>diameter <sup>b</sup> (μm) | Average<br>aspect ratio |
|------------------------------|-------------------------------------------|---------------------------------------|-------------------------|
| PULP                         | 1315                                      | 30 ± 10                               | 44                      |
| AcPULP                       | 1275                                      | 30 ± 10                               | 43                      |
| Fibers from 20%PULP/PCL WF   | 465                                       | <10*                                  | >47                     |
| Fibers from 20%PULP/PCL DF   | 352                                       | <10*                                  | >35                     |
| Fibers from 20%AcPULP/PCL WF | 550                                       | <10*                                  | >55                     |

<sup>a</sup> Mean arithmetic length assessed by a fiber analyzer.

<sup>b</sup> The average diameter of the fibers was assessed by SEM microscopy analysis, based on 100 measurements.

\* Fibers with diameter ranging from 10 μm to nanometric size were observed by SEM microscopy.
